# Supplementary material for: Inherited human OX40 deficiency underlying classic Kaposi sarcoma of childhood
Source: PubMed Central journal article supplement — J Exp Med. 2013 Aug 26;210(9):1743–59. doi: 10.1084/jem.20130592 (PMC3754857; doi:10.1084/jem.20130592), 2013-08-26
Supplement: supp_jem.20130592_JEM_20130592_sm.pdf [file supp_jem.20130592_JEM_20130592_sm.pdf]

## SUPPLEMENTAL MATERIAL

Byun et al., <http://www.jem.org/cgi/content/full/jem.20130592/DC1>**Table S1.** Genomic regions with positive LOD scores identified by homozygosity mapping

| Chromosome | Size      | Number of SNPs | Max. LOD score | 5' SNP     | 5' SNP position (GRCh37) | 3' SNP     | 3' SNP position (GRCh37) |
|------------|-----------|----------------|----------------|------------|--------------------------|------------|--------------------------|
|            | <i>Mb</i> |                |                |            |                          |            |                          |
| 1          | 1.36819   | 10             | 1.3132         | rs11240777 | 798959                   | rs262680   | 2167149                  |
| 1          | 1.938975  | 93             | 1.3285         | rs2480054  | 14792535                 | rs525409   | 16731510                 |
| 1          | 5.639601  | 334            | 1.3285         | rs2143808  | 17282425                 | rs209693   | 22922026                 |
| 1          | 0.348616  | 4              | 0.5198         | rs10902682 | 28274984                 | rs6669686  | 28623600                 |
| 1          | 17.196349 | 345            | 1.3285         | rs12118994 | 65029454                 | rs9324187  | 82225803                 |
| 1          | 2.174524  | 50             | 1.3285         | rs10493711 | 82689732                 | rs3738573  | 84864256                 |
| 1          | 2.675807  | 57             | 1.3285         | rs7514763  | 84930166                 | rs10873820 | 87605973                 |
| 1          | 0.83033   | 5              | 0.7945         | rs4601565  | 192621857                | rs1410511  | 193452187                |
| 2          | 0.615297  | 16             | 1.2718         | rs4240225  | 19013114                 | rs13012083 | 19628411                 |
| 2          | 0.360373  | 12             | 1.2828         | rs4422109  | 142165632                | rs10170191 | 142526005                |
| 2          | 0.525667  | 14             | 1.2859         | rs887701   | 191562927                | rs1551439  | 192088594                |
| 2          | 1.155207  | 11             | 0.5656         | rs6727480  | 198143871                | rs11688831 | 199299078                |
| 3          | 9.80742   | 309            | 1.3285         | rs2254295  | 8802292                  | rs17044638 | 18609712                 |
| 3          | 1.849264  | 71             | 1.3285         | rs10936674 | 170931099                | rs9833380  | 172780363                |
| 4          | 0.495594  | 13             | 1.0414         | rs4699738  | 100175530                | rs1426730  | 100671124                |
| 5          | 1.748478  | 16             | 1.3166         | rs17160705 | 100202927                | rs1505420  | 101951405                |
| 6          | 1.565978  | 53             | 1.3285         | rs3019442  | 162170524                | rs6903758  | 163736502                |
| 7          | 1.933765  | 60             | 1.3285         | rs992586   | 14210392                 | rs10950603 | 16144157                 |
| 7          | 0.197451  | 6              | 0.6458         | rs1362921  | 33914209                 | rs961652   | 34111660                 |
| 8          | 0.23235   | 10             | 0.6397         | rs4354280  | 98022432                 | rs6982771  | 98254782                 |
| 9          | 2.176653  | 72             | 1.3285         | rs10816043 | 9064648                  | rs901992   | 11241301                 |
| 9          | 0.112562  | 5              | 0.9729         | rs2102121  | 107815682                | rs7024094  | 107928244                |
| 10         | 2.85421   | 136            | 1.3285         | rs7079384  | 2692656                  | rs12258676 | 5546866                  |
| 10         | 0.113017  | 6              | 0.0244         | rs2243668  | 33563893                 | rs2776938  | 33676910                 |
| 11         | 3.469697  | 50             | 1.3174         | rs4755435  | 36136580                 | rs4315042  | 39606277                 |
| 11         | 7.09564   | 128            | 1.3285         | rs11035461 | 39799738                 | rs11039014 | 46895378                 |
| 12         | 5.046596  | 216            | 1.3285         | rs11063263 | 191619                   | rs501004   | 5238215                  |
| 13         | 2.299283  | 51             | 1.3285         | rs1216860  | 47232268                 | rs7338291  | 49531551                 |
| 13         | 9.038625  | 239            | 1.3285         | rs9302065  | 95971016                 | rs9519304  | 105009641                |
| 14         | 0.755496  | 27             | 1.3276         | rs3811209  | 22969651                 | rs977870   | 23725147                 |
| 14         | 0.155317  | 5              | 0.7288         | rs17105565 | 37335558                 | rs35576618 | 37490875                 |
| 14         | 0.22659   | 4              | 1.2251         | rs1016684  | 58206045                 | rs17094025 | 58432635                 |
| 15         | 6.65889   | 317            | 1.3285         | rs8043364  | 92013902                 | rs12441557 | 98672792                 |
| 17         | 0.374185  | 5              | 0.6798         | rs9748016  | 410451                   | rs9892880  | 784636                   |
| 17         | 1.484395  | 24             | 1.2836         | rs886076   | 49839893                 | rs1607977  | 51324288                 |
| 17         | 0.660638  | 22             | 1.3285         | rs12949090 | 78217097                 | rs868432   | 78877735                 |
| 18         | 0.789182  | 16             | 1.3228         | rs11662562 | 32232892                 | rs355317   | 33022074                 |

**Table S2.** List of variations unique to the patient that are homozygous and within the intervals identified by genome-wide linkage

| Gene           | Chromosome | Position (GRCh37) | Reference base | Sample base | Consequence | PolyPhen-2        | SIFT      |
|----------------|------------|-------------------|----------------|-------------|-------------|-------------------|-----------|
| <i>TNFRSF4</i> | 1          | 1149118           | G              | A           | p.R65C      | Probably damaging | Damaging  |
| <i>CLCNKA</i>  | 1          | 16360484          | C              | G           | Utr         | NA                | NA        |
| <i>IQSEC1</i>  | 3          | 12940954          | G              | A           | Utr         | NA                | NA        |
| <i>NR2C2</i>   | 3          | 15093941          | G              | A           | Utr         | NA                | NA        |
| <i>OXA1L</i>   | 14         | 23240510          | G              | A           | p.R363Q     | Benign            | Tolerated |

NA, not applicable.
